# Supplementary material
Source: MDPI journal article supplement (https://www.mdpi.com/2226-471X/9/5/158)
Supplement: s1 [file s1]

**Table S1.** The GLMMs summary for the morphosyntactic cloze probability and its interaction with the individual difference factors for HSs and L2 learners. The cells with estimates in which there is a significant effect (Bonferroni correction applied) are in bold.

| Predictors                      | WORD CLASS |       |              |                  | CASE     |       |              |                  | GENDER   |       |              |                  | NUMBER   |       |              |                  |
|---------------------------------|------------|-------|--------------|------------------|----------|-------|--------------|------------------|----------|-------|--------------|------------------|----------|-------|--------------|------------------|
|                                 | Log-Odds   | SE    | CI           | p                | Log-Odds | SE    | CI           | p                | Log-Odds | SE    | CI           | p                | Log-Odds | SE    | CI           | p                |
| (Intercept)                     | 3.173      | 0.334 | 2.518–3.827  | <b>&lt;0.001</b> | 2.032    | 0.268 | 1.507–2.556  | <b>&lt;0.001</b> | 2.704    | 0.348 | 2.022–3.387  | <b>&lt;0.001</b> | 3.257    | 0.316 | 2.638–3.876  | <b>&lt;0.001</b> |
| Group 1 (RHSs)                  | 0.606      | 0.249 | 0.117–1.095  | 0.242            | 0.146    | 0.181 | –0.208–0.500 | 1.0              | 0.076    | 0.187 | –0.290–0.442 | 1.0              | 0.188    | 0.223 | –0.249–0.624 | 1.0              |
| Age of Arrival to the USA (AoA) | 0.178      | 0.330 | –0.468–0.824 | 1.0              | 0.117    | 0.249 | –0.371–0.605 | 1.0              | 0.121    | 0.244 | –0.357–0.599 | 1.0              | 0.084    | 0.267 | –0.440–0.607 | 1.0              |
| Russian exposure                | –0.310     | 0.217 | –0.736–0.115 | 1.0              | –0.188   | 0.167 | –0.516–0.139 | 1.0              | –0.072   | 0.166 | –0.397–0.254 | 1.0              | 0.087    | 0.215 | –0.335–0.509 | 1.0              |
| Literacy experience             | 1.119      | 0.270 | 0.590–1.647  | <b>0.001</b>     | 0.622    | 0.207 | 0.217–1.027  | <b>0.042</b>     | 0.815    | 0.213 | 0.399–1.232  | <b>0.002</b>     | 0.579    | 0.232 | 0.125–1.033  | 0.200            |
| Production skills               | –0.284     | 0.269 | –0.812–244   | 1.0              | 0.210    | 0.211 | –0.205–0.624 | 1.0              | 0.010    | 0.202 | –0.385–0.406 | 1.0              | 0.083    | 0.227 | –0.361–0.528 | 1.0              |
| Target 1 (Adj)                  | –0.808     | 0.227 | –1.25––0.363 | <b>0.006</b>     | 0.054    | 0.208 | –0.353–0.461 | 1.0              | –0.062   | 0.293 | –0.636–0.511 | 1.0              | 0.240    | 0.219 | –0.190–0.669 | 1.0              |
| Context 1 (High)                | –0.001     | 0.219 | –0.431–0.429 | 1.0              | –0.043   | 0.208 | –0.450–0.365 | 1.0              | 0.070    | 0.292 | –0.502–0.641 | 1.0              | –0.230   | 0.220 | –0.660–201   | 1.0              |
| Group 1 * AoA                   | 0.128      | 0.331 | –0.520–0.776 | 1.0              | 0.409    | 0.253 | –0.087–0.904 | 1.0              | 0.194    | 0.246 | –0.288–0.676 | 1.0              | 0.066    | 0.267 | –0.457–0.589 | 1.0              |

|                                      |               |       |                  |               |        |       |                   |              |        |               |                  |     |               |       |                   |       |
|--------------------------------------|---------------|-------|------------------|---------------|--------|-------|-------------------|--------------|--------|---------------|------------------|-----|---------------|-------|-------------------|-------|
| Group 1 *<br>Russian exposure        | 0.039         | 0.219 | -0.390-<br>0.468 | 1.0           | -0.070 | 0.169 | -0.402-<br>0.262  | 1.0          | 0.132  | 0.170         | -0.202-<br>0.466 | 1.0 | -0.222        | 0.219 | -0.652-<br>0.208  | 1.0   |
| Group 1 *<br>Literacy experience     | -0.541        | 0.258 | -1.05-<br>-0.034 | 0.581         | -0.512 | 0.202 | -0.909-<br>-0.116 | 0.182        | -0.154 | 0.201         | -0.547-<br>0.240 | 1.0 | -0.377        | 0.229 | -0.826-<br>0.072  | 1.0   |
| Group 1 *<br>production skills       | 0.618         | 0.268 | 0.093-<br>1.143  | 0.336         | 0.850  | 0.215 | 0.430-<br>1.271   | <b>0.001</b> | 0.249  | 0.203         | -0.148-<br>0.647 | 1.0 | 0.471         | 0.229 | 0.022-<br>0.920   | 0.635 |
| Group 1 *<br>Target 1                | 0.105         | 0.133 | -0.156-<br>0.366 | 1.0           | 0.105  | 0.095 | -0.081-<br>0.291  | 1.0          | 0.072  | 0.121         | -0.166-<br>0.309 | 1.0 | 0.237         | 0.145 | -0.047-<br>0.520  | 1.0   |
| Group 1 *<br>Context 1               | 0.159         | 0.134 | -0.104-<br>0.423 | 1.0           | 0.104  | 0.095 | -0.083-<br>0.291  | 1.0          | -0.056 | 0.121         | -0.293-<br>0.180 | 1.0 | -0.057        | 0.144 | -0.340-<br>0.226  | 1.0   |
| Target 1 *<br>Context 1              | -0.293        | 0.222 | -0.728-<br>0.141 | 1.0           | -0.077 | 0.208 | -0.484-<br>0.330  | 1.0          | -0.333 | 0.291         | -0.905-<br>0.238 | 1.0 | -0.546        | 0.221 | -0.979-<br>-0.113 | 0.215 |
| Group 1 *<br>Target 1 *<br>Context 1 | -0.210        | 0.134 | -0.472-<br>0.052 | 1.0           | 0.063  | 0.095 | -0.124-<br>0.250  | 1.0          | 0.143  | 0.121         | -0.094-<br>0.380 | 1.0 | -0.134        | 0.144 | -0.417-<br>0.149  | 1.0   |
| <b>Random Effects</b>                |               |       |                  |               |        |       |                   |              |        |               |                  |     |               |       |                   |       |
| $\sigma^2$                           | 3.29          |       |                  | 3.29          |        |       | 3.29              |              |        | 3.29          |                  |     | 3.29          |       |                   |       |
| $\tau_{00}$                          | 0.80 subject  |       |                  | 0.46 subject  |        |       | 0.20 subject      |              |        | 0.20 subject  |                  |     | 0.32 subject  |       |                   |       |
|                                      | 1.24 SENT_ID  |       |                  | 1.45 SENT_ID  |        |       | 2.34 SENT_ID      |              |        | 2.34 SENT_ID  |                  |     | 1.03 SENT_ID  |       |                   |       |
| N                                    | 48 SENT_ID    |       |                  | 47 SENT_ID    |        |       | 40 SENT_ID        |              |        | 40 SENT_ID    |                  |     | 47 SENT_ID    |       |                   |       |
|                                      | 58 subject    |       |                  | 58 subject    |        |       | 58 subject        |              |        | 58 subject    |                  |     | 58 subject    |       |                   |       |
| Observations                         | 1317          |       |                  | 1222          |        |       | 976               |              |        | 976           |                  |     | 1222          |       |                   |       |
| Marginal<br>R <sup>2</sup> /         | 0.284 / 0.557 |       |                  | 0.170 / 0.475 |        |       | 0.128 / 0.507     |              |        | 0.128 / 0.507 |                  |     | 0.204 / 0.435 |       |                   |       |

Conditional  
R<sup>2</sup>

**Table S2.** Summary of (g)LMMs for the dependent measures for monolingual group for the target noun in Experiment 2. The cells with estimates in which there is a significant effect (Bonferroni correction applied) are in bold.

| Predictors                     | FFD                |       |              |                  | SFD          |       |              |                  | GD                 |       |              |                  | TT                 |       |              |                  |
|--------------------------------|--------------------|-------|--------------|------------------|--------------|-------|--------------|------------------|--------------------|-------|--------------|------------------|--------------------|-------|--------------|------------------|
|                                | Est.               | SE    | CI           | p                | Est.         | SE    | CI           | p                | Est.               | SE    | CI           | p                | Est.               | SE    | CI           | p                |
| (Intercept)                    | 5.4                | 0.08  | 5.3–5.7      | <b>&lt;0.001</b> | 5.44         | 0.093 | 5.3–5.7      | <b>&lt;0.001</b> | 5.6                | 0.102 | 5.3–5.8      | <b>&lt;0.001</b> | 5.754              | 0.130 | 5.5–6.01     | <b>&lt;0.001</b> |
| Word length                    | 0.053              | 0.026 | 0.003–0.104  | 0.267            | 0.087        | 0.030 | 0.029–0.145  | <b>0.025</b>     | 0.152              | 0.032 | 0.089–0.215  | <b>&lt;0.001</b> | 0.187              | 0.040 | 0.109–0.265  | <b>&lt;0.001</b> |
| Word frequency                 | –0.053             | 0.040 | –0.132–0.026 | 1.0              | –0.044       | 0.047 | –0.135–0.048 | 1.0              | –0.087             | 0.050 | –0.186–0.012 | 0.603            | –0.076             | 0.062 | –0.198–0.046 | 1.0              |
| Block                          | 0.032              | 0.011 | 0.010–0.054  | <b>0.029</b>     | 0.031        | 0.011 | 0.009–0.053  | <b>0.047</b>     | 0.045              | 0.014 | 0.019–0.072  | <b>0.006</b>     | 0.118              | 0.016 | 0.086–0.149  | <b>&lt;0.001</b> |
| Grammaticality (gram)          | 0.030              | 0.012 | 0.007–0.053  | 0.083            | 0.042        | 0.011 | 0.020–0.065  | <b>0.001</b>     | 0.043              | 0.016 | 0.011–0.074  | 0.058            | 0.082              | 0.018 | 0.046–0.117  | <b>&lt;0.001</b> |
| Target gender (FEM)            | 0.008              | 0.017 | –0.025–0.040 | 1.0              | 0.020        | 0.019 | –0.017–0.057 | 1.0              | 0.026              | 0.021 | –0.015–0.067 | 1.0              | 0.010              | 0.026 | –0.040–0.060 | 1.0              |
| Grammaticality * Target gender | 0.015              | 0.012 | –0.008–0.037 | 1.0              | 0.024        | 0.011 | 0.002–0.046  | 0.240            | 0.025              | 0.015 | –0.004–0.054 | 0.626            | 0.008              | 0.017 | –0.025–0.042 | 1.0              |
| <b>Random Effects</b>          |                    |       |              |                  |              |       |              |                  |                    |       |              |                  |                    |       |              |                  |
| $\sigma^2$                     | 0.11               |       |              |                  | 0.11         |       |              |                  | 0.14               |       |              |                  | 0.21               |       |              |                  |
| $\tau_{00}$                    | 0.02 subject       |       |              |                  | 0.02 subject |       |              |                  | 0.03 subject       |       |              |                  | 0.09 subject       |       |              |                  |
|                                | 0.00 itemr         |       |              |                  | 0.00 itemr   |       |              |                  | 0.00 itemr         |       |              |                  | 0.01 itemr         |       |              |                  |
| $\tau_{11}$                    | 0.00 subject.cond1 |       |              |                  |              |       |              |                  | 0.00 subject.cond1 |       |              |                  | 0.00 subject.cond1 |       |              |                  |

|                                                         |                  |                  |                  |
|---------------------------------------------------------|------------------|------------------|------------------|
| Q01                                                     | 0.00 itemr.cond1 | 0.00 itemr.cond1 | 0.00 itemr.cond1 |
|                                                         | 0.47 subject     | 0.20 subject     | 0.29 subject     |
|                                                         | 0.16 itemr       | 0.07 itemr       | 0.15 itemr       |
| Observations                                            | 1044             | 866              | 1044             |
| Marginal R <sup>2</sup> /<br>Conditional R <sup>2</sup> | 0.038 / 0.175    | 0.060 / 0.216    | 0.113 / 0.304    |
|                                                         |                  |                  | 0.123 / 0.406    |

**Table S3.** Summary of (g)LMMs for the duration measures for RHSs group for the target noun in the Experiment 2. The cells with estimates in which there is a significant effect (Bonferroni correction applied) are in bold.

| Predictors                     | FFD    |       |              |                  | SFD    |       |              |                  | GD     |       |              |                  | TT     |       |              |                  |
|--------------------------------|--------|-------|--------------|------------------|--------|-------|--------------|------------------|--------|-------|--------------|------------------|--------|-------|--------------|------------------|
|                                | Est.   | SE    | CI           | p                |
| (Intercept)                    | 5.847  | 0.098 | 5.654–6.039  | <b>&lt;0.001</b> | 5.823  | 0.132 | 5.563–6.084  | <b>&lt;0.001</b> | 6.774  | 0.249 | 6.286–7.262  | <b>&lt;0.001</b> | 7.269  | 0.309 | 6.662–7.877  | <b>&lt;0.001</b> |
| Word length                    | –0.020 | 0.030 | –0.078–0.039 | 1.0              | –0.002 | 0.044 | –0.089–0.085 | 1.0              | 0.300  | 0.078 | 0.146–0.454  | <b>0.001</b>     | 0.339  | 0.098 | 0.148–0.531  | <b>0.004</b>     |
| Word frequency                 | –0.050 | 0.046 | –0.140–0.040 | 1.0              | –0.005 | 0.066 | –0.134–0.125 | 1.0              | –0.300 | 0.122 | –0.540–0.059 | 0.102            | –0.372 | 0.152 | –0.671–0.073 | 0.104            |
| Block                          | 0.028  | 0.018 | –0.007–0.064 | 0.829            | 0.035  | 0.024 | –0.013–0.082 | 1.0              | 0.129  | 0.021 | 0.087–0.171  | <b>&lt;0.001</b> | 0.184  | 0.019 | 0.146–0.222  | <b>&lt;0.001</b> |
| Grammaticality (gram)          | 0.009  | 0.018 | –0.026–0.045 | 1.0              | 0.035  | 0.024 | –0.012–0.082 | 1.0              | 0.001  | 0.021 | –0.041–0.043 | 1.0              | 0.023  | 0.019 | –0.015–0.060 | 1.0              |
| Target gender (FEM)            | –0.006 | 0.019 | –0.044–0.031 | 1.0              | 0.015  | 0.024 | –0.032–0.062 | 1.0              | 0.007  | 0.050 | –0.092–0.105 | 1.0              | 0.025  | 0.063 | –0.098–0.148 | 1.0              |
| Grammaticality * Target gender | 0.012  | 0.018 | –0.024–0.048 | 1.0              | 0.012  | 0.024 | –0.035–0.058 | 1.0              | 0.038  | 0.021 | –0.004–0.080 | 0.544            | –0.000 | 0.019 | –0.038–0.037 | 1.0              |

| Random Effects                                          |                         |                         |                         |                         |
|---------------------------------------------------------|-------------------------|-------------------------|-------------------------|-------------------------|
| $\sigma^2$                                              | 0.27                    | 0.19                    | 0.38                    | 0.31                    |
| $\tau_{00}$                                             | 0.04 <sub>subject</sub> | 0.04 <sub>subject</sub> | 0.14 <sub>subject</sub> | 0.21 <sub>subject</sub> |
|                                                         |                         |                         | 0.03 <sub>itemr</sub>   | 0.05 <sub>itemr</sub>   |
| Observations                                            | 830                     | 366                     | 830                     | 830                     |
| Marginal R <sup>2</sup> /<br>Conditional R <sup>2</sup> | 0.004 / 0.143           | 0.013 / 0.191           | 0.161 / 0.422           | 0.215 / 0.581           |

**Table S4.** Summary of (g)LMMs for the duration measures for L2 learner group for the target noun in Experiment 2. The cells with estimates in which there is a significant effect (Bonferroni correction applied) are in bold.

| Predictors                | FFD        |           |                  |                       | SFD        |           |                  |                       | GD         |           |                       |                       | TT         |           |                  |                       |
|---------------------------|------------|-----------|------------------|-----------------------|------------|-----------|------------------|-----------------------|------------|-----------|-----------------------|-----------------------|------------|-----------|------------------|-----------------------|
|                           | Est.       | SE        | CI               | p                     | Est.       | SE        | CI               | p                     | Est.       | SE        | CI                    | p                     | Est.       | SE        | CI               | p                     |
| (Intercept)               | 5.944      | 0.13<br>1 | 5.686–<br>6.201  | <b>&lt;0.00<br/>1</b> | 5.817      | 0.19<br>5 | 5.434–<br>6.200  | <b>&lt;0.00<br/>1</b> | 6.669      | 0.23<br>3 | 6.211–<br>7.128       | <b>&lt;0.00<br/>1</b> | 7.054      | 0.27<br>9 | 6.507–<br>7.601  | <b>&lt;0.00<br/>1</b> |
| Word length               | −0.02<br>8 | 0.04<br>3 | −0.113<br>−0.057 | 1.0                   | 0.035      | 0.06<br>4 | −0.090<br>−0.161 | 1.0                   | 0.208      | 0.07<br>7 | 0.056–<br>0.360       | 0.051                 | 0.200      | 0.09<br>2 | 0.019–<br>0.382  | 0.213                 |
| Word<br>frequency         | −0.06<br>8 | 0.06<br>8 | −0.201<br>−0.065 | 1.0                   | 0.057      | 0.10<br>1 | −0.142<br>−0.255 | 1.0                   | −0.27<br>7 | 0.12<br>1 | −0.515<br>–<br>−0.039 | 0.158                 | −0.26<br>3 | 0.14<br>5 | −0.547<br>−0.020 | 0.481                 |
| Block                     | 0.042      | 0.01<br>7 | 0.009–<br>0.076  | 0.097                 | 0.045      | 0.02<br>2 | 0.001–<br>0.089  | 0.304                 | 0.096      | 0.01<br>9 | 0.058–<br>0.133       | <b>&lt;0.00<br/>1</b> | 0.133      | 0.02<br>0 | 0.094–<br>0.171  | <b>&lt;0.00<br/>1</b> |
| Grammaticalit<br>y (gram) | 0.040      | 0.02<br>4 | −0.008<br>−0.088 | 0.691                 | 0.055      | 0.03<br>3 | −0.009<br>−0.119 | 0.656                 | 0.011      | 0.02<br>7 | −0.042<br>−0.064      | 1.0                   | 0.005      | 0.02<br>9 | −0.052<br>−0.061 | 1.0                   |
| Target gender<br>(FEM)    | −0.07<br>5 | 0.05<br>6 | −0.184<br>−0.035 | 1.0                   | −0.07<br>0 | 0.08<br>1 | −0.229<br>−0.089 | 1.0                   | −0.05<br>4 | 0.10<br>0 | −0.250<br>−0.141      | 1.0                   | −0.10<br>6 | 0.11<br>9 | −0.339<br>−0.127 | 1.0                   |

|                                                         |               |       |                  |     |               |       |                  |     |               |       |                  |     |                    |       |                  |     |
|---------------------------------------------------------|---------------|-------|------------------|-----|---------------|-------|------------------|-----|---------------|-------|------------------|-----|--------------------|-------|------------------|-----|
| Grammaticality * Target gender                          | -0.019        | 0.034 | -0.086<br>-0.049 | 1.0 | 0.004         | 0.045 | -0.084<br>-0.092 | 1.0 | 0.016         | 0.038 | -0.058<br>-0.091 | 1.0 | 0.013              | 0.039 | -0.063<br>-0.090 | 1.0 |
| <b>Random Effects</b>                                   |               |       |                  |     |               |       |                  |     |               |       |                  |     |                    |       |                  |     |
| $\sigma^2$                                              | 0.23          |       |                  |     | 0.19          |       |                  |     | 0.29          |       |                  |     | 0.30               |       |                  |     |
| $\tau_{00}$                                             | 0.03 subject  |       |                  |     | 0.06 subject  |       |                  |     | 0.08 subject  |       |                  |     | 0.12 subject       |       |                  |     |
|                                                         | 0.01 itemr    |       |                  |     | 0.02 itemr    |       |                  |     | 0.03 itemr    |       |                  |     | 0.05 itemr         |       |                  |     |
| $\tau_{11}$                                             |               |       |                  |     |               |       |                  |     |               |       |                  |     | 0.00 subject.cond1 |       |                  |     |
| $\rho_{01}$                                             |               |       |                  |     |               |       |                  |     |               |       |                  |     | -0.11 subject      |       |                  |     |
| Observations                                            | 800           |       |                  |     | 415           |       |                  |     | 800           |       |                  |     | 800                |       |                  |     |
| Marginal R <sup>2</sup> /<br>Conditional R <sup>2</sup> | 0.020 / 0.153 |       |                  |     | 0.025 / 0.296 |       |                  |     | 0.139 / 0.378 |       |                  |     | 0.133 / 0.443      |       |                  |     |
